# Supplementary material for: Physical Activity Habits and Well-Being among 6-Year-Old Children: The “Improving Umbrian Kids’ Healthy Lifestyle”, an Uncontrolled Pilot Study Project
Source: PubMed Central journal article supplement (PMC7503798; doi:10.3390/ijerph17176067), 2020-08-20
Supplement: ijerph-17-06067-s001.pdf [file ijerph-17-06067-s001.pdf]

Supplementary Materials:

Figure S1: "General form" of Self-report questionnaires measures proposed

RISERVATO AL TECNICO  
NOME E COGNOME DEL BAMBINO \_\_\_\_\_  
SCUOLA \_\_\_\_\_ ID \_\_\_\_\_

**SEZIONE I - PER IL GENITORE**

**In questa scheda verranno richiesti una sola volta alcuni dati relativi al suo nucleo familiare. E' indifferente quale dei due genitori compili questa parte. Legga con attenzione ogni domanda e metta una crocetta sulla risposta corretta.**

**QUESTIONARIO COMPILATO DA:** 1. Mamma del bambino 2. Papà del bambino

**GENERE DEL BAMBINO:** 1. M 2. F **ANNO DI NASCITA DEL BAMBINO:** 1. 2006  
2. 2007  
3. 2008  
4. 2009  
5. 2010

**IL BAMBINO E' NATO:** 1. Italia  
2. Estero

**LUOGO DI NASCITA**

**MADRE:** 1. Italia  
2. Europa dell'Est  
3. Europa Occidentale  
4. Africa  
5. Asia  
6. America del Nord  
7. America Latina  
8. Altro \_\_\_\_\_

**PADRE:** 1. Italia  
2. Europa dell'Est  
3. Europa Occidentale  
4. Africa  
5. Asia  
6. America del Nord  
7. America Latina  
8. Altro \_\_\_\_\_

**STATO CIVILE DEI GENITORI:**  
1. Nubile/celibe 2. Sposati/convivente 3. Separati/divorziati 4. Vedova/o

**MADRE:** Et : ..... Altezza: .....

**TITOLO DI STUDIO:**  
1. Scuola Elementare  
2. Scuola Media Inferiore  
3. 2/3 anni di Scuole Superiori  
4. Scuola Media Superiore  
5. Qualche anno di Universit , Lauree brevi, Diploma post-maturit   
6. Lauree  
7. Corsi/Specializzazione Post-Universit 

**Peso attuale: .....**

**OCCUPAZIONE:**  
1. Disoccupati, studenti universitari, lavori saltuari, casalinghe, pensionati  
2. Lavori domestici (colf, badante, baby-sitter, bracciante)  
3. Operai generici  
4. Operai semi-specializzati, operatori di macchinari  
5. Piccoli commercianti, artigiani, operai specializzati, affittuari agrari  
6. Impiegati, geometri, ragionieri, educatori, insegnanti  
7. Tecnici, semiprofessionisti, proprietari di piccole imprese  
8. Professionisti minori, artisti, professionisti dello spettacolo  
9. Funzionari amministrativi in grandi aziende, funzionari effettivi dell'esercito  
10. Incarichi dirigenziali di alto livello, alti gradi dell'esercito, incarichi istituzionali a livello statale – regionale – provinciale

**PADRE:** Et : ..... Altezza: .....

**TITOLO DI STUDIO:**

1. Scuola Elementare
2. Scuola Media Inferiore
3. 2/3 anni di Scuole Superiori
4. Scuola Media Superiore
5. Qualche anno di Universit , Lauree brevi, Diploma post-maturit 
6. Lauree
7. Corsi/Specializzazione post-Universit 

Peso attuale: .....

**OCCUPAZIONE:**

1. Disoccupati, studenti universitari, lavori saltuari, casalinghe, pensionati
2. Lavori domestici (colf, badante, baby-sitter, bracciante)
3. Operai generici
4. Operai semi-specializzati, operatori di macchinari
5. Piccoli commercianti, artigiani, operai specializzati, affittuari agrari
6. Impiegati, geometri, ragionieri, educatori, insegnanti
7. Tecnici, semiprofessionisti, proprietari di piccole imprese
8. Professionisti minori, artisti, professionisti dello spettacolo
9. Funzionari amministrativi in grandi aziende, funzionari effettivi dell'esercito
10. Incarichi dirigenziali di alto livello, alti gradi dell'esercito, incarichi istituzionali a livello statale – regionale – provinciale

**CI SONO ALTRI FIGLI?** 1. SI

Se SI, indicare: 1) Genere: 1. M 2. F

2) Genere: 1. M 2. F

3) Genere: 1. M 2. F

4) Genere: 1. M 2. F

2. NO

Et : ..... Altezza: ..... Peso: .....

**ORA LE FAREMO ALCUNE DOMANDE CHE RIGUARDANO IL SUO BAMBINO/A**

**Il suo bambino/a ha una qualche disabilit ?** 1. SI 2. NO

Se SI, di quale tipo? (specificare) \_\_\_\_\_

**Durante il mese passato...**

Mediamente, quante ore per notte ha dormito

**suo figlio durante la settimana?**

1. Pi  di 11 ore per notte

2. Tra le 9 e le 11 ore per notte

3. Meno di 9 ore per notte

Quante ore esattamente? .....

Mediamente, quante ore per notte ha

dormito **suo figlio** durante il **fine settimana?**

1. Pi  di 11 ore per notte

2. Tra le 9 e le 11 ore per notte

3. Meno di 9 ore per notte

Quante ore esattamente? .....

**Come descriverebbe la qualit  del sonno di suo figlio:**

1. Molto buona

2. Piuttosto buona

3. Piuttosto scarsa

4. Molto scarsa

Tendenzialmente consumate almeno un pasto al giorno tutti insieme?

1. SI

2. NO

Quanti pasti consumate tutti insieme durante la settimana?

1. Meno di 4 pasti

2. 4 o pi  pasti

Mediamente quante ore al giorno vostro figlio passa davanti alla televisione o computer o giocando con i videogame **durante la settimana?**

1. Da 0 a 2 ore al giorno

2. Da 3 a 4 ore al giorno

3. Pi  di 5 ore al giorno

Mediamente quante ore al giorno vostro figlio passa davanti alla televisione o computer o giocando con i videogame **durante il fine settimana?**

1. Da 0 a 2 ore al giorno

2. Da 3 a 4 ore al giorno

3. Pi  di 5 ore al giorno
